# Supplementary material
Source: PubMed Central journal article supplement (PMC7860514)
Supplement: ao0c05890_si_001.pdf [file ao0c05890_si_001.pdf]

## Supporting Information

### PLLA porous microspheres reinforced silk-based scaffolds for auricular cartilage regeneration

Yan Zeng<sup>a</sup>, Xiaokai Li<sup>b, c</sup>, Xia Liu<sup>a</sup>, Yuzhou Yang<sup>b, c</sup>, Zhimin Zhou<sup>b, c, \*</sup>, Jincai Fan<sup>a, \*</sup>, Haiyue Jiang<sup>a, \*</sup>

<sup>a</sup>Plastic Surgery Hospital and Institute, Chinese Academy of Medical Sciences & Peking Union Medical College, Beijing, 100144, China

<sup>b</sup>Biomedical Barriers Research Center, Institute of Biomedical Engineering, Chinese Academy of Medical Sciences & Peking Union Medical College, Tianjin, 300192, China

<sup>c</sup>Tianjin Key Laboratory of Biomedical Materials, Tianjin, 300192, China

\*Corresponding Author:

E-mail: [jianghy\\_academy@163.com](mailto:jianghy_academy@163.com) (Professor Haiyue Jiang)

[zhouzm@bme.cams.cn](mailto:zhouzm@bme.cams.cn) (Professor Zhimin Zhou)

[fanjincaimd@hotmail.com](mailto:fanjincaimd@hotmail.com) (Professor Jincai Fan)

S1

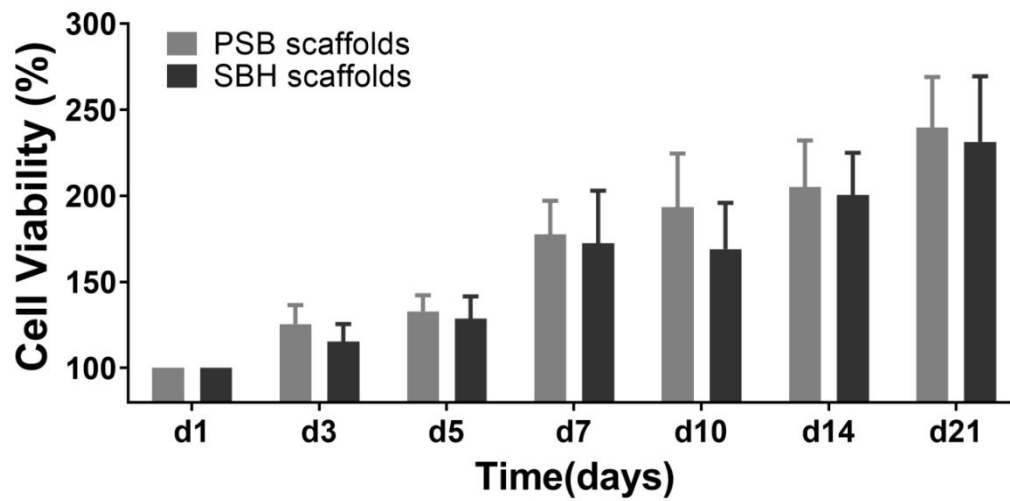

**Figure S1** cell viability and proliferation of chondrocytes on PSB and SBH scaffolds measured by CCK-8 assays after seeding for 1-21 days.
